# Supplementary material for: SIV replication is directly downregulated by four antiviral miRNAs
Source: PubMed Central journal article supplement (PMC3766675; doi:10.1186/1742-4690-10-95), 2013-08-29

Figure S2

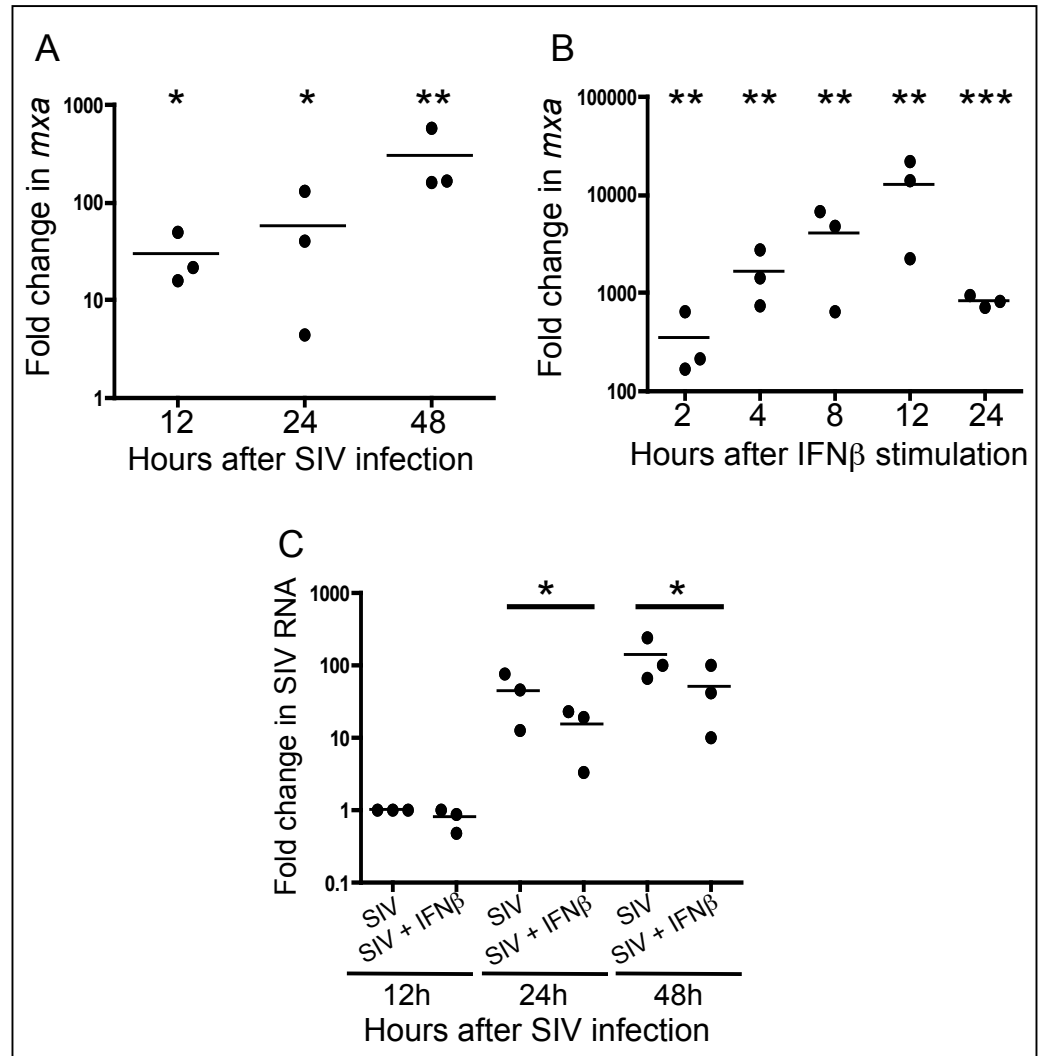

Supplement: 1742-4690-10-95-S3.pdf [file 1742-4690-10-95-S3.pdf]
